# Supplementary material for: Brain development in adolescents at ultra-high risk for psychosis: Longitudinal changes related to resilience
Source: PubMed Central journal article supplement — Neuroimage Clin. 2016 Aug 13;12:542–9. doi: 10.1016/j.nicl.2016.08.013 (PMC5030366; doi:10.1016/j.nicl.2016.08.013), 2016-08-13
Supplement: mmc8.pdf [file mmc8.pdf]

Corpus callosum – mid anterior region (volume)

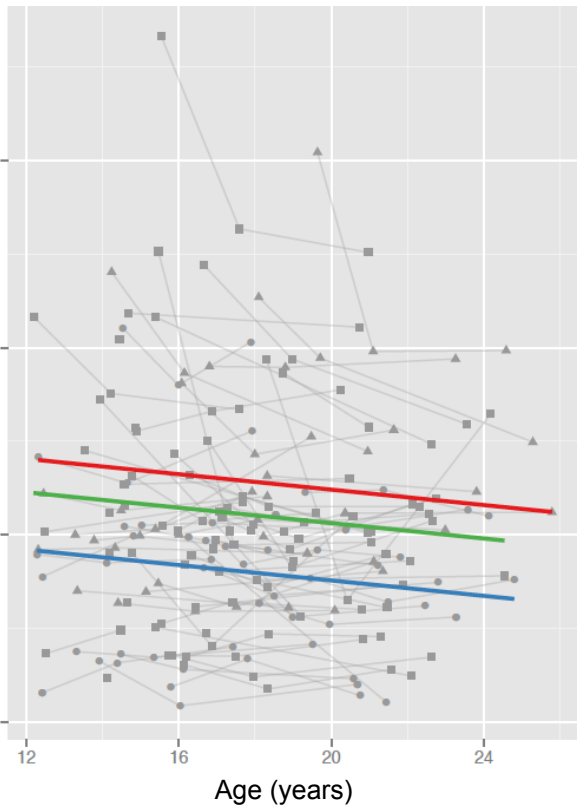

Left precuneus (volume)

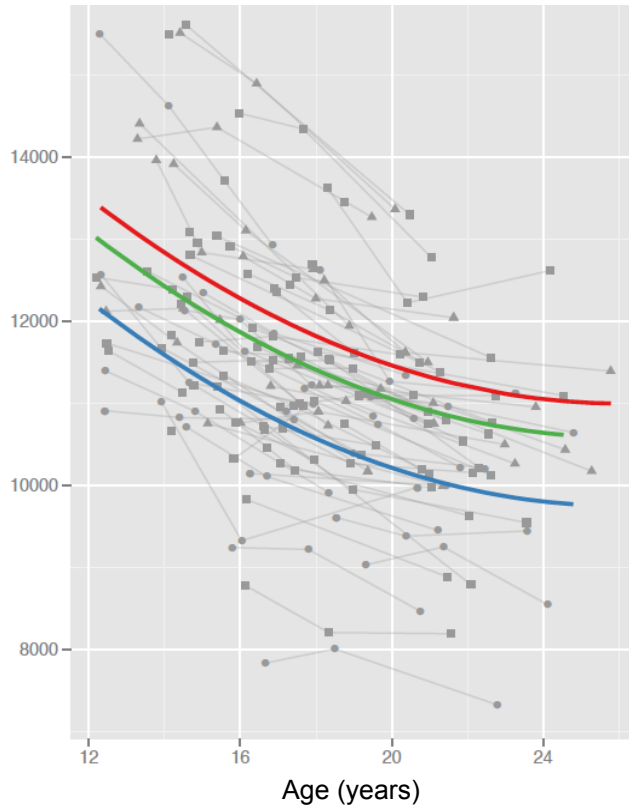

Inferior Frontal Gyrus - Pars Triangularis (cortical thickness)

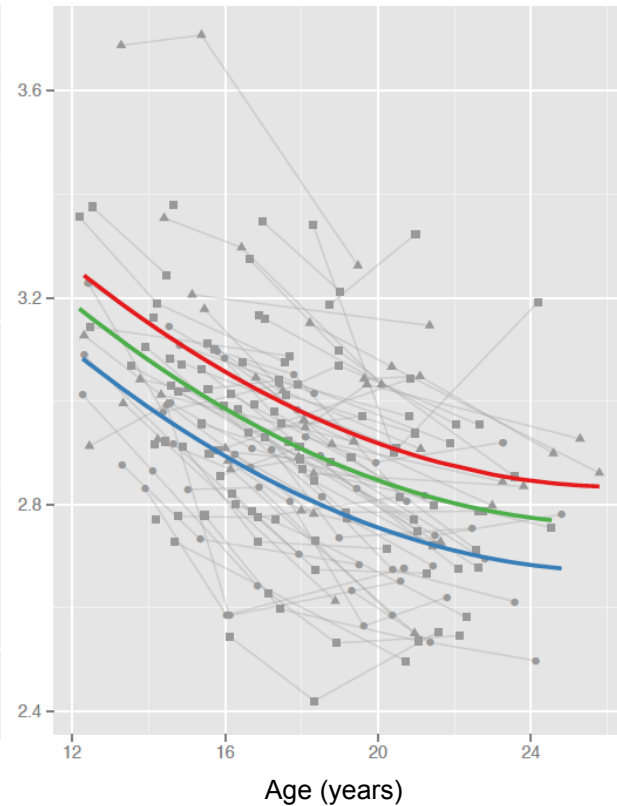

- Non-resilient individuals
- Resilient individuals
- Typically developing controls
